# Supplementary material for: Repellency of Plant Extracts against the Legume Flower Thrips Megalurothrips sjostedti (Thysanoptera: Thripidae)
Source: MDPI journal article supplement (doi:10.3390/insects6030608), 2015-06-26
Supplement: s1 [file s1]

## Supplement Materials

**Table S1.** Major compounds of least repellent plant extracts from different sources.

| No | Common name            | Botanical name                      | Major compounds                                                                 | References   |
|----|------------------------|-------------------------------------|---------------------------------------------------------------------------------|--------------|
| 1  | Thyme<br>(common)      | <i>T. vulgaris</i>                  | Thymol (35%), p-cymene (23%), carvacrol (15%)                                   | [1]          |
| 2  | Citronella             | <i>Cymbopogon nardus</i>            | Citronellal (35.5%), Geraniol (27.9%), Citronellol (10.7%)                      | [2]          |
| 3  | Pennyroyal             | <i>Mentha pulegium</i>              | (+)-pulegone (87%)                                                              | IBMM, France |
| 4  | Satureja biflora       | <i>Satureja biflora</i>             | Linalool (50.60 %), germacrene D (10.63 %)                                      | [3]          |
| 5  | Geranium               | <i>Pelargonium graveolens</i>       | citronellol (41%)—geraniol (18%)                                                | IBMM, France |
| 6  | Neem                   | <i>Melia azadirachta</i>            | azadirachtin (,1%)                                                              | IBMM, France |
| 7  | Coriander              | <i>Coriandrum sativum</i>           | (+)-linalool (72%)                                                              | IBMM, France |
| 8  | Dill                   | <i>Anethum graveolens</i>           | (+)-carvone (60%)—limonene (30%)                                                | IBMM, France |
| 9  | African blue<br>basil  | <i>Ocimum<br/>kilimandscharicum</i> | Camphor (56.07%), DL-limonene (13.56%)                                          | [4]          |
| 10 | Ginger                 | <i>Zingiber officinale</i>          | Zingiberene (30%)                                                               | IBMM, France |
| 11 | Litsea                 | <i>Litsea cubeba</i>                | Geranial (45%), neral (32%)                                                     | IBMM, France |
| 12 | Thyme Borneol          | <i>T hymus satureioides</i>         | Borneol (31.2%), camphene (27.4%), $\alpha$ -pinene (17.5%) and linalool (6.3%) | [5]          |
| 13 | Conza newii            | <i>Conza newii</i>                  | (S)-(-)-perillyl alcohol, (S)-(-)-perillaldehyde, geraniol, (R)                 | [6]          |
| 14 | Lemon                  | <i>Citrus limon</i>                 | Limonene (95%)                                                                  | IBMM, France |
| 15 | Satureja<br>abyssinica | <i>Satureja abyssinica</i>          | pulegone (43.5%), isomenthone (40.7%)                                           | [7]          |
| 16 | Solidago               | <i>Solidago canadensis</i>          | Germacrene D (32%) - Limonene (13%)                                             | IBMM, France |
| 17 | Rose mary              | <i>Rosmalinus officinalis</i>       | 1,8-cineole (,1%), camphene (,1%), camphor (,1%)                                | IBMM, France |

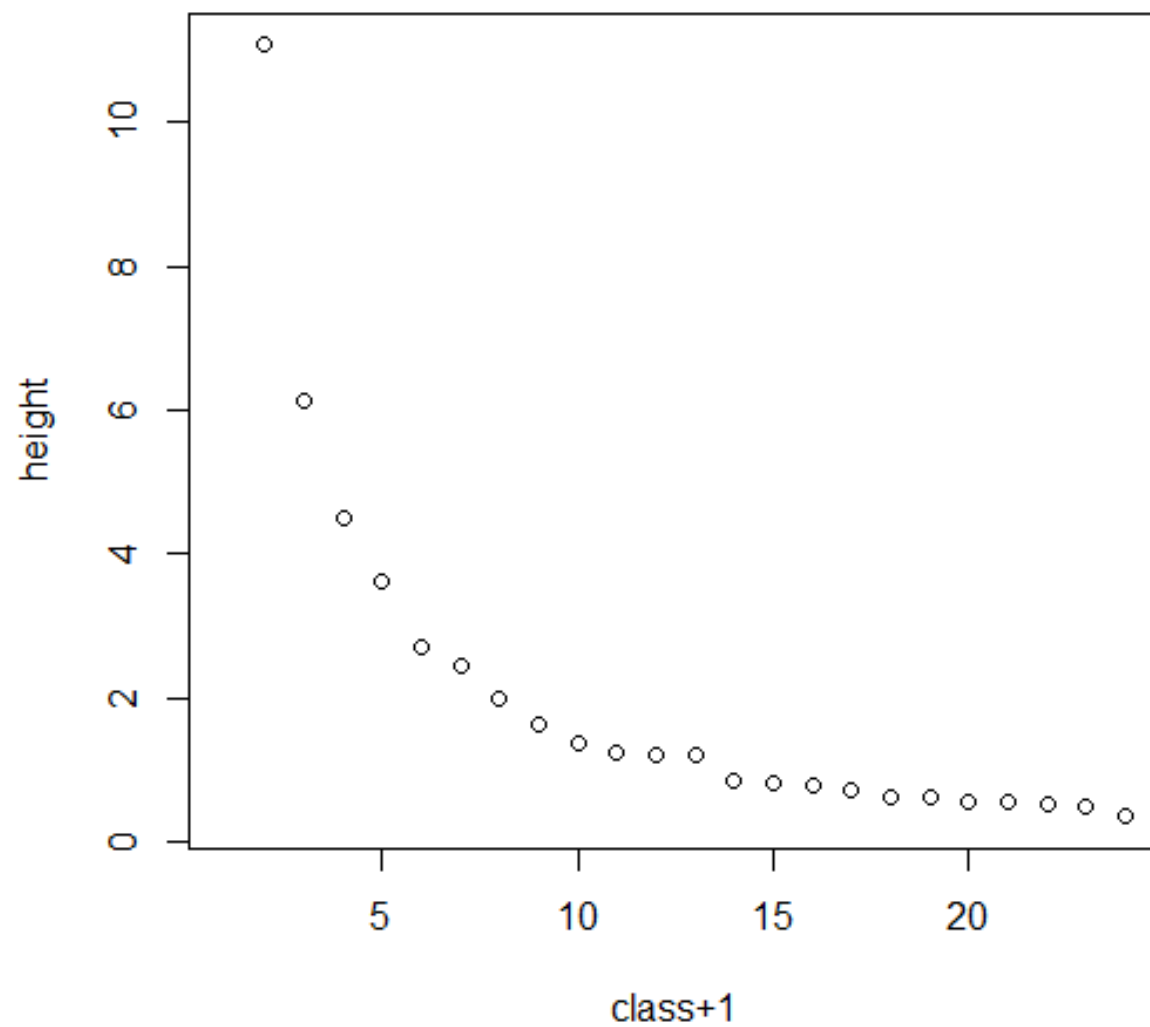

**Figure S1.** Branch height used to get the optimal number of classes in the tree which was determined by the decrease of the interclass variance.

## References

1. IBMM—Institut des Biomolécules Max Mousseron, Montpellier, France. Available online: <http://www.ibmm.univ-montp1.fr/?lang=fr> (accessed on 24 May 2015).

2. Koba, K.; Sanda, K.; Guyon, C.; Raynaud, C.; Chaumont, J.P.; Nicod, L. *In vitro* cytotoxic activity of *Cymbopogon citratus* L. and *Cymbopogon nardus* L. essential oils from Togo. *Bangladesh J. Pharmacol.* **2009**, *4*, 29–34.
3. Matasyoha, J.C.; Kiplimoa, J.J.; Karubiub, N.M.; Hailstorks, T.P. Chemical composition and antimicrobial activity of the essential oil of *Satureja biflora* (Lamiaceae) Bull. *Chem. Soc. Ethiop.* **2007**, *21*, 249–254.
4. Tantaoui-Elaraki, A.; Lattaoui, N.; Errift, A.; Benjlali, B. Composition and antimicrobial activity of essential oils of *Thymus broussonettii*. *J. Essent. Oil Res.* **1993**, *5*, 45–53.
5. Narwal, S.; Rana, A.C.; Tiwari, V.; Gangwani, S.; Sharma, R. Review on chemical constituents & pharmacological action of *Ocimum kilimandscharicum*. *Indo-Global J. Pharm. Sci.* **2011**, *4*, 287–293.
6. Mayeku, W.P.; Omollo, N.I.; Odalo, O.J.; Hassanali, A. Chemical composition and mosquito repellency of essential oil of *Conyza newii* propagated in different geographical locations of Kenya. *Med. Vet. Entomol.* **2013**, doi:10.1111/mve.12039.
7. Tolossa, K.; Asres, K.; El-Fiky, F.K.; Singab, A.N.B.; Bucar, F. Composition of the essential oils of *Satureja abyssinica* ssp. *abyssinica* and *Satureja paradoxa*: Their antimicrobial and radical scavenging activities. *J. Essential Oil Res.* **2007**, *19*, 295–300.
